# Supplementary material
Source: PubMed Central journal article supplement (PMC3318419)
Supplement: supp_80.4.1408_IAI-IAI06181-11-s02.pdf [file supp_80.4.1408_IAI-IAI06181-11-s02.pdf]

**Supplementary table 1. Demographics and baseline disease characteristics of the patients' groups**

|                                            | Crohn's Disease | Ulcerative Colitis | Controls    |
|--------------------------------------------|-----------------|--------------------|-------------|
| No. of cases                               | 12              | 7                  | 19          |
| Age (years; median and ranges)             | 14 (12–17)      | 10 (8–13)          | 12.7 (9-16) |
| M/F                                        | 7/5             | 3/4                | 11/8        |
| Weight (Kg) (mean ± SD)                    | 30.6 (± 12.2)   | 33.9 ± 13.1        | 36.2 ± 9.6  |
| Height (cm) (mean ± SD)                    | 133.8 (±19.1)   | 138.3 ± 22.1       | 140 ±25.3   |
| BMI (Kg/cm <sup>2</sup> ) (mean ± SD)      | 16.4 ± 2.0      | 17.0 ± 2.2         | 20 ± 2.1    |
| Disease duration (weeks; median and range) | 6 (2-12)        | 8 (3- 12)          | -           |
| Disease Location                           |                 |                    |             |
| Upper involvement                          | 5/12 (42%)      | 0/6 (0%)           | -           |
| Lower involvement                          |                 |                    |             |
| Ileum                                      | 0 (0%)          | 0 (0%)             | -           |
| Ileo-colon                                 | 12/12 (100%)    | 7/7 (100%)*        | -           |
| Colon                                      |                 |                    |             |
| total                                      | -               | 7/7 (100%)         | -           |
| left sided                                 | -               | -                  | -           |
| proctitis                                  | -               | -                  | -           |
| Previous endoscopic assessment             | 0/12 (0%)       | 3/7 (57%)**        | 0/19 (0%)   |
| Previous treatment                         |                 |                    |             |
| Sulfasalazine                              | 0/12 (0%)       | 0/7 (0%)           | -           |
| 5-aminosalicylic acid drug                 | 0/12 (0%)       | 0/7 (0%)           | -           |
| Steroid                                    | 0/12 (0%)       | 1/7 (8%)§          | -           |
| Current treatment                          |                 |                    |             |
| Sulfasalazine                              | 2/12 (25%)      | 0/7 (0%)           | -           |
| 5-aminosalicylic acid drug                 | 0/12 (0%)       | 3/7 (43%)          | -           |
| PCDAI (mean ± SD)                          | 42.5 ± 11       | -                  |             |
| PUCAI (mean ± SD)                          | -               | 71.4 ± 7.5         | -           |
| CDEIS (mean ± SD)                          | 13.5 ± 3.5      | -                  | -           |
| Baron's endoscopic score                   | -               | 2.7 ± 0.5          | -           |

\* ileum involvement as backwash ileitis; \*\*Sigmoidoscopy in all of them; § steroid as enema  
PCDAI, Pediatric Crohn's Disease Activity Index<sup>22</sup>; PUCAI: Pediatric Ulcerative Colitis Activity Index<sup>23</sup>;  
CDEIS: Crohn's Disease Endoscopic Index of Severity<sup>24</sup>; Baron's endoscopic score<sup>25</sup>
